# Supplementary material for: An in vivo assessment of the cholesterol-lowering efficacy of Lactobacillus plantarum ECGC 13110402 in normal to mildly hypercholesterolaemic adults
Source: PubMed Central journal article supplement (PMC5724841; doi:10.1371/journal.pone.0187964), 2017-12-11
Supplement: pone.0187964.s001.pdf [file pone.0187964.s001.pdf]

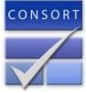

## CONSORT 2010 checklist of information to include when reporting a randomised trial\*

| Section/Topic             | Item No | Checklist item                                                                                                                                  | Reported on page No |
|---------------------------|---------|-------------------------------------------------------------------------------------------------------------------------------------------------|---------------------|
| <b>Title and abstract</b> |         |                                                                                                                                                 |                     |
|                           | 1a      | Identification as a parallel, double blind, placebo controlled, randomised trial                                                                | 2                   |
|                           | 1b      | Structured summary of trial design, methods, results and conclusions (for specific guidance see CONSORT for abstract)                           | 2                   |
| <b>Introduction</b>       |         |                                                                                                                                                 |                     |
| Background and objectives | 2a      | Specific Background and explanation of rationale                                                                                                | 5-8                 |
|                           | 2b      | Specific objectives and hypotheses                                                                                                              | 4-5                 |
| <b>Methods</b>            |         |                                                                                                                                                 |                     |
| Trial design              | 3a      | Description of the trial design (such as parallel, factorial) including allocation ratio                                                        | 7                   |
|                           | 3b      | Important changes to methods after trial commencement with reasons                                                                              | 6                   |
| Participants              | 4a      | Eligibility criteria for participants                                                                                                           | 5                   |
|                           | 4b      | Setting and locations where the data were collected                                                                                             | 6 +24               |
| Interventions             | 5       | The interventions for each group with sufficient details to allow replication, including how and when they were actually administrated          | 5-6                 |
| Outcomes                  | 6a      | Completely defined pre-specified primary and secondary outcome measures, including how and when they were assessed                              | 24-33               |
|                           | 6b      | Any changes to trial outcomes after their trial commenced with reasons                                                                          | NA                  |
| Sample size               | 7a      | How sample size was determined                                                                                                                  | 6                   |
|                           | 7b      |                                                                                                                                                 | NA                  |
| <b>Randomisation:</b>     |         |                                                                                                                                                 |                     |
| Sequence generation       | 8a      | Method used to generate the random allocation sequence                                                                                          | 6                   |
|                           | 8b      | Type of randomisation; details of any restriction                                                                                               | 6                   |
| Allocation concealment    | 9       | Mechanism used to implement the random allocation sequence describing any steps taken to conceal the sequence until interventions were assigned | NA                  |

|                                                      |         |                                                                                                                                 |            |
|------------------------------------------------------|---------|---------------------------------------------------------------------------------------------------------------------------------|------------|
| mechanism                                            |         |                                                                                                                                 |            |
| Implementation                                       | 10      | Who generated the random allocation sequence, who enrolled participants and who assigned to interventions                       | 6          |
| Blinding                                             | 11a     | If done who was blinded after assignment to interventions and how                                                               | 6          |
|                                                      | 11b     | If relevant, description of the similarity of interventions                                                                     | NA         |
| Statistical methods                                  | 12a     | Statistical methods used to compare groups for primary and secondary outcomes                                                   | 25-33      |
| <hr/>                                                |         |                                                                                                                                 |            |
| Results                                              |         |                                                                                                                                 |            |
| Participant flow (a diagram is strongly recommended) | 13a/13b |                                                                                                                                 | 5-6, 24-33 |
| <hr/>                                                |         |                                                                                                                                 |            |
| Recruitment                                          | 14a     | Dates defining the periods of recruitment and follow up                                                                         | 6          |
|                                                      | 14b     | Why the trial ended or was stopped                                                                                              | NA         |
| Baseline data                                        | 15      | A table showing the Demographic and clinical characteristics for each group                                                     | 24         |
| Numbers analysed                                     | 16      | For each group number of participants included in each analysis and whether the analysis was by original assigned groups        |            |
| Outcomes and estimation                              | 17a     | For each primary and secondary outcome, the results for each group and the estimated effect have shown 95% confidence interval. | 24         |
| Ancillary analyses                                   | 17 b    | NA                                                                                                                              | NA         |
|                                                      | 18      |                                                                                                                                 | NA         |
| Harms                                                | 19      | All important harms or unintended effects in each group                                                                         | NA         |
| Discussion                                           | 20      | Trial limitations, addressing sources of potential bias, imprecision, and if relevant multiplicity of analyses                  | NA         |
| <hr/>                                                |         |                                                                                                                                 |            |
| Limitations                                          |         |                                                                                                                                 |            |
| Generalisability                                     | 21      | Generalisability of the trial findings                                                                                          | NA         |
| Interpretation                                       | 22      |                                                                                                                                 | 16-22      |

---

**Other information**

|              |    |                                                            |         |
|--------------|----|------------------------------------------------------------|---------|
| Registration | 23 | Registration number and name of the trial                  | 1 and 5 |
| Protocol     | 24 | Where the full trial protocol can be accessed if available | 5       |
| Funding      | 25 | Sources of funding and other support, role of the funders  | 20      |

---

\*We strongly recommend reading this statement in conjunction with the CONSORT 2010 Explanation and Elaboration for important clarifications on all the items. If relevant, we also recommend reading CONSORT extensions for cluster randomised trials, non-inferiority and equivalence trials, non-pharmacological treatments, herbal interventions, and pragmatic trials. Additional extensions are forthcoming: for those and for up to date references relevant to this checklist, see [www.consort-statement.org](http://www.consort-statement.org).
